# Supplementary material for: Museomics Unveil the Phylogeny and Biogeography of the Neglected Juan Fernandez Archipelago Megalachne and Podophorus Endemic Grasses and Their Connection With Relict Pampean-Ventanian Fescues
Source: Front Plant Sci. 2020 Jun 26;11:819. doi: 10.3389/fpls.2020.00819 (PMC7333454; doi:10.3389/fpls.2020.00819)
Supplement: TABLE S1 — List of taxa included in the phylogenetic study of the Fernandezian and other Loliinae grasses. Taxon, source, ploidy level, nuclear ITS, plastid trnTL and trnLF, plastome and rDNA cistron Genbank codes, average alignment insert size, total number of pair-end reads, number of plastome assembled reads, and number of rDNA cistron assembled reads are indicated for the corresponding samples. [file Data_Sheet_2.xlsx]

## Sheet: Supplementary Table 1
Taxon	Source	Ploidy	GenBank Accession code			GenBank/Phytozome Accession code			Average alignment insert size	Total number of pair-end reads	Number of plastome assembled reads	Number of rDNA cistron assembled reads
			ITS	trnTLF	trnTL	Plastome		rDNA cistron
Dielsiochloa floribunda (Pilg.) Pilg.	Bolivia: La Paz; Cumbre near La Paz ; Muller J.;MA 721312	?	DQ539563	DQ631428	DQ631494	------	------	------
Festuca abyssinica Hochst. ex A. Rich.	Tanzania: Kilimanjaro; Afroalp PopSpecNo TZ-0095-5; Afroalp CatNoFull O-DP-42737	4x	------	------	------	SAMN14647043	SRR11576633	MT145276	166	12041	62836	68734
Festuca actae Connor	New Zealand: Canterbury; Banks peninsula; Lake Forsyth; Lloyd K.M. 57589	6x	AY524829	AY528949	EF584998	------	------	------
Festuca africana (Hack.) Clayton	Uganda: Gahinga; hypericum forest; Namaganda 190Vg; MHU1603; 3170m	10x	KY368800	KY368852	KY368903	SAMN14647044	SRR11576632	MT145277	195	13549	193396	23500
Festuca agustinii Linding.	Spain: Canarias; Tenerife; Anaga Bailadero; A.Santos	2x	AY099005	AY099003	EF584999	------	------	------
Festuca aloha Catalán, Soreng & P.M.Peterson	USA: Hawaii; Kauai; PTBG 17678; R. Wood 1704	?	GQ162206	GQ162208	-	------	------	------
Festuca alpina Suter	Spain: Hawaii Kauai; PTBG 17678; R. Wood 1704	2x	AF303415	AF478522	EF585001	------	------	------
Festuca altaica Trin.	Canada: Yukon Territory; Teslin Lake; Soreng R.J. 5996; US	4x	AF532952	AF533055	EF585002	------	------	------
Festuca amplissima Rupr.	Mexico: Chihuahua; Barranca del Cobre; Peterson P.M.; Catalan P. 17573	6x	------	------	------	SAMN14647045	SRR11576621	MT145278	220	12058	104462	27272
Festuca andicola Kunth	Ecuador: Azuay; Cuenca; Parque Nacional Cajas; HUTPL14032	4x	EF584922	EF592955	EF585009	------	------	------
Festuca argentina (Speg.) Parodi	Argentina: Santa Cruz; Lago Argentino; Peterson P.M. 17158	4x	EF584923	EF592957	EF585012	------	------	------
Festuca arundinacea Schreb. subsp. arundinacea var. letourneuxiana (St.-Yves) Torrecilla & Catalán	Morocco: Atlas Mountains, ABY BN400	10x	------	------	------	SAMN14647059	SRR11576625	MT145292	250	16839	97892	145790
Festuca asperella E.B. Alexeev	Mexico: Mexico DF; Morelos boundary; Trott et al. 142; MO 2744225	?	KY368796	KY368848	-	------	------	------
Festuca asplundii E.B. Alexeev	Ecuador: Loja; Saraguro; Vía Urdaneta-Yacuambi	6x	------	------	------	SAMN14647046	SRR11576610	MT145279	300	25088	169540	24566
Festuca baffinensis Polunin	Canada: Northwest Masik River Valley; Gillespie L.J. & al.7116	4x	EF584925	EF592958	EF585013	------	------	------
Festuca bajacaliforniana Gonz.-Led. & S.D. Koch	Mexico : Peterson; 5287; US	?	KY368814	KY368865	KY368914	------	------	------
Festuca borbonica Spreng.	Mascarenes: Reunion Island; Besnard GB03-2013	?	KY368840	KY368892	KY368939	------	------	------
Festuca brachyphylla Schult. & Schult. f.	USA: Alaska; North Slope Borough Prudhoe Bay; Soreng R.J. 6243 US	6x	EF584927	KY368876	EF585016
Festuca breviglumis Swallen	Mexico: Jalisco; Ciudad Guzman; Peterson P.M.; Rosales O.16078	?	AY367952	EF592960	EF585017	------	------	------
Festuca brevissima Jurtzev	USA: Alaska; Denali Borough Alaska Range; Soreng R.J.6021 US	2x	EF584928	EF592961	EF585018	------	------	------
Festuca calabrica Huter, Porta & Rigo	Italy: Calabria; Cosenza; Muller J. 10838	?	KY368798	KY368850	KY368901	------	------	------
Festuca caldasii (Kunth) Kunth	Ecuador: Catamayo; route Las Chinchas -Tambara	?	------	------	------	SAMN14647047	SRR11576604	MT145280	248	9863	158092	17516
Festuca californica Vasey	USA: Oregon; Benton County; Wilson B. 7014	8x	AF532956	AF533054	EF585020	------	------	------
Festuca calligera (Piper) Rydb.	USA: New Mexico; Sangre Cristo Mts; Allred K. 8262	4x	EF584929	EF592962	EF585021	------	------	------
Festuca capillifolia Dufour ex Roem. & Schult.	Morocco : Middle Atlas; Ifrane National Park; PC 77.17	2x	------	------	------	SAMN14647048	SRR11576603	MT145281	228	13430	183114	150400
Festuca caprina Nees	South Africa: Eastern Cape; Catalan & Pimentel; UZ- SA026	4x	KY368825	KY368877	KY368923	------	------	------
Festuca carpatica F. Dietr.	Slovak Republic: VysokeL; Tatry Mts. Tisovnice; Marhold K. s.n.	4x	AY099006	AY099001	EF585023	------	------	------
Festuca casapaltensis Ball	Peru: Lima; Canta Cordillera Viuda; Peterson 20289; Soreng; and Romashchenko. US	?	KY368832	KY368884	KY368930	------	------	------
Festuca chimborazensis E.B. Alexeev	Ecuador: Riobamba; route Chimborazo-Cotopaxi; HUTPL14066	4x	------	------	------	SAMN14647049	SRR11576602	MT145282	254	10913	311132	41408
Festuca chodatiana (St.-Yves) E.B. Alexeev	Uganda: Elgon; Mnt. Namaganda 322E	4x	KY368842	KY368894	KY368941	------	------	------
Festuca claytonii E.B. Alexeev	Uganda: Elgon; Mnt. Namaganda 271E	4x	KY368843	KY368895	KY368942	------	------	------
Festuca cochabambana E.B.Alexeev	Bolivia: Cochabamba; Chapare; Muller J. 9277	?	EF584931	EF592964	EF585026	------	------	------
Festuca coerulescens Desf.	Spain: Cadiz; Jerez de la Frontera; Catalan P. & al.; UZ-91.2000	2x	AF538363	AF533051	EF585027	------	------	------
Festuca compressifolia J. Presl	Peru: Huancavelica; Tayacaja; Peterson P. M. 14144 & O. Tovar; MO 5750428	?	KY368833	KY368885	KY368931	------	------	------
Festuca contracta Kirk	South Georgia Islands: HU Peter s/n; JE.	6x	KY368819	KY368870	-	------	------	------
Festuca costata Nees	South Africa: Eastern Cape; Amathole Mnts.; Stuttenheim 2; Catalan & Pimentel; UZ-SA024	4x	KY368801	KY368853	KY368904	------	------	------
Festuca cuzcoensis Stančík & P.M. Peterson	Peru: Cuzco; Calca; Peterson P.M. & Refulgio-Rodriguez 16582	?	EF584932	EF592966	EF585029	------	------	------
Festuca dichoclada Pilg.	Peru: Junin; Tarma Maraynioc; Peterson P.M.; Tovar O. 14056; US-3421417	?	EF584933	EF592967	EF585031	------	------	------
Festuca dimorpha Guss.	France: Alpes de Haute-Provence Col des Champs; Korneck D. s.n; Herb. Muller J. 10969	2x,4x	AF519982	AF519987	EF585032	------	------	------
Festuca donax Lowe	Portugal: Madeira: Porto Moniz; Catalan P. & Sequeira M., UZ-MS4515	2x	EF584935	EF592968	EF585033	------	------	------
Festuca durandoi Clauson	Portugal: Serra Arga; Alto do Espinheiro	2x	------	------	------	SAMN14647050	SRR11576601	MT145283	217	12688	42884	153004
Festuca elata Keng ex E.B. Alexeev	China: Yunnan; Lushui; Gaoligong Shan; Soreng R.J.& al. 5268; US-3420890	?	EF584937	EF592970	EF585037	------	------	------
Festuca elegans Boiss.	Spain. Granada; Baza; Cebolla & Rivas-Martinez s.n.;UAM	2x,4x	AF303406	AF478509	EF585038	------	------	------
Festuca elviae Briceño	Venezuela: Mérida; Laguna de Coromoto; Catalán P. s.n. MERC	4x		AF543517	EF585039	------	------	------
Festuca eskia Ramond ex DC.	Spain: León; Picos de Europa: Colladines 3; FE321	2x	------	------	------	SAMN14647051	SRR11576600	MT145284	300	24041	215594	304740
Festuca extremiorientalis Ohwi	Russia: Krasnoyarsk; Pen'kovskaya & N Sozinova; LE	4x	KY368812	KY368863	KY368912	------	------	------
Festuca fenas Lag.	Spain: W Mediterranean; PI289654	4x	------	------	------	SAMN14647052	SRR11576599	MT145285	271	16112	221450	61950
Festuca fimbriata Nees	Argentina: Misiones; Dpto. Apóstoles; Marcelo Kostling 44; UZ 498.08	6x	------	------	------	SAMN14647053	SRR11576631	MT145286	173	15741	64234	41572
Festuca flacca Hack. ex E.B. Alexeev	Ecuador: Pichincha; Amaguana; Volcano Pasochoa; Stancik D.; US-3428939	4x	EF584938	EF592971	EF585041	------	------	------
Festuca fontqueriana (St.-Yves) Romo	Morocco: Rif Mountains; Talassemtane National Park; Outa-El-Kadir to Dj. Lakraa	2x	------	------	------	SAMN14647054	SRR11576630	MT145287	300	22187	721238	214938
Festuca francoi Fern. Prieto, C. Aguiar, E. Días & M.I. Gut.	Portugal: Açores: Terceira, Caldeira de St. Bárbara, nas cristas expostas e taludes do último 1 km até ao topo, Sequeira, MS4403	2x	------	------	------	SAMN14647057	SRR11576627	MT145290	186	17592	213218	77606
Festuca gautieri (Hack.) K. Richt.	Spain: Girona Pyrenees; Nuria; Catalan P.; Mirones V. UZ	2x	AF303414	AF478507	EF585044	------	------	------
Festuca gigantea (L.) Vill.	Spain: Navarra; Arce; Aizpuru & Catalan; UZ s. n.	6x	AF303416	AF533043	EF379003	------	------	------
Festuca gilbertiana E.B. Alexeev ex S.M. Phillips	Ethiopia: Simen; Namaganda	?	KY368844	KY368896	-	------	------	------
Festuca glacialis Miégev. ex Bureau	Spain: Huesca Pyrenees; Cotiella; Catalan P. 2002	2x	AF303428	AF478523	EF585045	------	------	------
Festuca glumosa Hack. ex E.B. Alexeev	Ecuador: Imbabura; Cayambe Volcano Cayambe; Stancik.; US-3428930	4x	EF584940	EF592973	EF585046	------	------	------
Festuca gracillima Hook. f.	Argentina: Tierra de Fuego; Catalan. UZ- 482.08	6x	------	------	------	SAMN14647055	SRR11576629	MT145288	224	13888	167296	93250
Festuca griffithiana (St.-Yves) Krivot.	Afghanistan: Hajigak pass. Furse 8489; LE	?	KY368813	KY368864	KY368913	------	------	------
Festuca hephaestophila Nees (Nees)	Mexico: Nuevo Leon; Sierra Madre Oriental; Peterson P.M.;Knowless M.B. 13347; US	?	EF584943	EF592976	EF585048	------	------	------
Festuca hieronymi Hack.	Argentina: Córdoba; Yacanto de Calamuchita. Catalan P. UZ-383.08	6x	KY368835	KY368887	KY368933	------	------	------
Festuca holubii Stančík	Ecuador: Saraguro; route to Cerro de Arcos; HUTPL14071	?	------	------	------	SAMN14647056	SRR11576628	MT145289	249	10264	253806	56342
Festuca hyperborea Holmen ex Fred.	Canada: Northwest Territories; Prince Patrick Island; Gillespie L.J.; Consaul L.L. 6893	4x	EF584946	EF592978	EF585050	------	------	------
Festuca hystrix Boiss.	Spain: Almerıa; Sierra de Gador; Catalan P. & al.; UZ- 31.2000	2x	AF478480	AF478520	EF585051	------	------	------
Festuca iberica (Hack.) K. Richt.	Spain: Granada; Sierra Nevada; Borreguiles de S. Juan; Catalan P. & al.; UZ- 77.2000	6x	AY118087	AF478516	EF585052	------	------	------
Festuca indigesta Boiss.	Spain: Granada; Sierra Nevada; Catalan P. & al.; UZ-43.2000	6x	AF303426	AF478519	EF585054	------	------	------
Festuca juncifolia Chaub.	Spain: Lugo Viveiro; Brieiro; Arenales de Area; López- Rodríguez J.A. 1366; UZ	8x	AF478478	AF478515	EF585057	------	------	------
Festuca kingii (S. Watson) Cassidy	USA: Colorado; Boulder Co; Flat Irons; Catalan P. UZ-1.93	8x	AF303410	AY099004	EF585058	------	------	------
Festuca lasto Boiss.	Spain: Cadiz; Jerez de la Frontera: Los Alcornocales	2x	------	------	------	SAMN14647058	SRR11576626	MT145291	300	21581	224446	56486
Festuca laxa Host	Slovak Republic: Veliki Stador; Gutermann et al. 38483	4x	KY368816	KY368867	KY368917	------	------	------
Festuca longipes Stapf	South Africa: Cape Province; Encobo district. Catalan & Pimentel. UZ- SA031	?	KY368804	KY368856	KY368907	------	------	------
Festuca luciarum Connor	New Zealand: Maungaharuru Range; Hawkes Bay; LloydK.M. 57621	8x	AY524828	AY528939	EF585064	------	------	------
Festuca magellanica Lam.	Argentina: Tierra de Fuego; Ctra. Haberton; Catalan & A. Sarria UZ-461.08	6x,8x	KY368829	KY368881	KY368927	------	------	------
Festuca mairei St.-Yves	Morocco: Mahgrebian; PI-610941	4x	------	------	------	SAMN14647060	SRR11576624	MT145293	254	19134	302524	91040
Festuca mekiste Clayton	Kenya: Mt. Elgon National Park; Carvalho 4521	?	KY368805	KY368857	KY368908	------	------	------
Festuca modesta Nees ex Steud.	China: Yunnan Fugong (Bijiang); Soreng R.J. & al. 5227 US-3420887	2x	EF584953	EF592985	EF585068	------	------	------
Festuca molokaiensis Soreng, P.M. Peterson & Catalán	USA: Hawai: Molokai; BISH 728771	?	------	------	------	SAMN14647061	SRR11576623	MT145294	219	12188	46122	43038
Festuca nardifolia Griseb.	Argentina: Salta Abra; El Acay; Peterson P.M. 10379	?	EF584954	EF592986	EF585070	------	------	------
Festuca nemoralis Türpe	Argentina: Jujuy; Yala; Laguna Rodeo; Catalan 358.08 & J. Müller.	8x	KY368821	KY368872	KY368920	------	------	------
Festuca nitida Kit. ex Schult.	Montenegro: Prutas; Hangmulde nordöstlich unter dem Gipfe; Gutermann et al. 38891; UZ	2x	KY368826	KY368878	KY368924	------	------	------
Festuca novae-zelandiae (Hack.) Cockayne	New Zealand: Fiorland; Lloyd K.M. 57940	6x	AY524832	AY528941	EF585073	------	------	------
Festuca orthophylla Pilg.	Bolivia: Tarija; Aviles; Copacabana; Muller J. 9245	8x	EF584957	EF592989	EF585075	------	------	------
Festuca ovina L.	Rusia: Leningradskaya Oblast’; Gatchinskii Raion; № 4365; coll. N.S. Probatova & A.P. Sokolovskaya; PC 54	2x	------	------	------	SAMN14647062	SRR11576622	MT145295	215	11364	69246	79642
Festuca pampeana Speg.	Argentina: Buenos Aires; Sierra de la Ventana; sendero al Cerro Ventana; P. Catalan 428.08	8x	------	------	------	SAMN14647063	SRR11576620	MT145296	223	14862	72914	235404
Festuca paniculata (L.) Schinz & Thell	Spain: Caceres; Puerto de los Castaños; UZ 40.07	2x	------	------	------	SAMN14647064	SRR11576619	MT145297	300	35808	473682	403042
Festuca parvigluma Steud.	China: Henan: Neixiang Xian; Baotianman Nature Reserve; dowstream from Pingfang. MO 4922557	4x	------	------	------	SAMN14647065	SRR11576618	MT145298	190	15872	243310	105592
Festuca peruviana Infantes	Peru: Lima; Canta; Cordillera Viuda; Peterson P.M. 20293	?	KY368836	KY368888	KY368934	------	------	------
Festuca petraea Guthn. ex Seub	Portugal: Azores; St. Maria; Maia; Sequeira M. 4393	2x	EF584962	EF592994	EF585081	------	------	------
Festuca picturata Pils	Austria: Tirol; Zillertaler Alpen Plauener Hütte; Schonswetter & Katharina; UZ 11.08	2x	KY368827	KY368879	KY368925	------	------	------
Festuca pratensis Huds.	England: USDA/283306	2x	------	------	------	SAMN14647066	SRR11576617	MT145299	271	30021	245576	112544
Festuca pringlei St.-Yves	Mexico: Zacatecas; Peterson P.M. 21440; US	?	AF303421	AF478503	EF379007	------	------	------
Festuca procera Kunth	Ecuador: Bolivar; P.M. Peterson 9297 & E.J. Judziewicz; MO 3853384	4x	------	------	------	SAMN14647067	SRR11576616	MT145300	263	12189	675414	278236
Festuca pseudeskia Boiss.	Spain: Granada; Sierra Nevada; Collado del Diablo; Catalan P. & al.; UZ-73.2000	2x	AF519979	AY099000	EF585084	------	------	------
Festuca pumila Chaix	Slovak Republic: Veliki Stador. Gutermann 38499, UZ 4.08	2x	KY368817	KY368868	KY368918	------	------	------
Festuca purpurascens Banks & Sol. ex Hook. f.	Argentina: Santa Cruz; Lago Argentino; Peterson P.M. 17147	6x	EF584964	EF592996	EF585087	------	------	------
Festuca pyrenaica Reut.	Spain: Huesca; P. N. Ordesa; Tobacor	4x	------	------	------	SAMN14647068	SRR11576615	MT145301	300	40669	1104654	133298
Festuca pyrogea Speg.	Argentina: Tierra de fuego; Cabo San Pablo; 494.08; 30/12/2008	?	------	------	------	SAMN14647069	SRR11576614	MT145302	193	16835	31716	90354
Festuca quadridentata Kunth	Ecuador: Chimborazo; Alao; 3200 msnm; Coll. M. Acosta Solis; 01/03/ 1944; NMNH-SI 1911313	?	------	------	------	SAMN14647070	SRR11576613	MT145303	130	15091	61858	14906
Festuca rigescens (J. Presl) Kunth	Peru: Ancash; Recuay; Cordillera Blanca; Peterson;Refulio Rodriguez; US-3423058	?	EF584966	EF592999	KY368936	------	------	------
Festuca rubra L.	Finland: A.Kosonen (Hb.Univ.Oulu) JACA JA-474496	6x	EF584968	EF593001	EF585097	------	------	------
Festuca saximontana Rydb.	USA: Oregon; Soreng R. J. 6021-1	6x	EF584969	EF593002	EF585098	------	------	------
Festuca scabra Vahl	South Africa; KwaZulu Natal; Underberg; Sani Pass; Catalan & Pimentel; UZ-SA047	4x,6x	KY368797	KY368849	KY368900	------	------	------
Festuca scariosa Lag. ex Willk.	Spain: Almerıa; Sierra Filabres; Las Menas; Catalan P.& al.; UZ- 62.2000	2x	AF519978	AY098999	EF585100	------	------	------
Festuca spectabilis Jan	Italy: Lombardia; Bergamo; Passo della Presolana; Muller J.8229	6x	------	------	------	SAMN14647071	SRR11576612	MT145304	221	12960	42352	90950
Festuca subantarctica Parodi	Argentina: Santa Cruz; Peterson P.M. 17163	?	EF584973	EF593004	EF585103	------	------	------
Festuca subulata Trin.	USA: Oregon; Clatsop County; Saddle Mnts; Wilson B. 10512	2x,4x	AF532953	AF533056	EF585104	------	------	------
Festuca subverticillata (Pers.) E.B. Alexeev	USA: West Virginia; Grant Co.; Peterson P.M.; Saarela J.M. 15784; US	6x	EF584974	EF593006	EF585106	------	------	------
Festuca superba Parodi ex Türpe	Argentina: Jujuy; Yala; Laguna Rodeo; arroyo al W de la laguna; P. Catalan 356.08 & J. Müller.	8x	------	------	------	SAMN14647072	SRR11576611	MT145305	221	12193	22702	54668
Festuca thurberi Vasey	USA: New Mexico; Sangre Cristo; Mts; Allred K. 8257	4x,6x	EF584975	EF593007	EF585107	------	------	------
Festuca tolucensis Kunth	Venezuela: Mérida; Paramo de Piedras Blancas; Catalan P.; UZ-99.2000; MERC	4x	EF584976	EF593038	EF585108	------	------	------
Festuca triflora J.F. Gmel.	Morocco: Rif Mountains; Bab Barret-Ketama; P.Catalan & Mario Mairal; PC 39.17	2x	------	------	------	SAMN14647073	SRR11576609	MT145306	300	24472	543924	145104
Festuca vaginalis (Benth.) Laegaard	Ecuador: Chimborazo; Riobamba; Vía Chimborazo-Guaranda; HUTPL14121	4x	EF584977	EF593010	EF585111	------	------	------
Festuca valdesii Gonz.-Led. & S.D. Koch	México: Cohauila P.M. Peterson 21456 US	?	MT022521	MT040974	MT040975	------	------	------
Festuca ventanicola Speg.	Argentina: Buenos Aires; Sierra de la Ventana; Catalan UZ- 418.08	6x	KY368823	KY368874	KY368922	------	------	------
Festuca vulpioides Steud.	South Africa: Eastern Cape; Amathole Mnts. Catalan & Pimentel; UZ- SA032	?	KY368828	KY368880	KY368926	------	------	------
Festuca yalaensis Joch. Müll. & Catalán	Argentina: Jujuy; Yala; Laguna Rodeo; Catalan & Müller; UZ-358.08	?	GQ849279	GQ849280	GQ849281	------	------	------
Hellerochloa fragilis (Luces) Rauschert	Venezuela: Mérida; Páramo de Piedras Blancas; Catalán P. s.n. MERC	?	AF303401	AF478504	EF379024	------	------	------
Lolium perenne L.	UK: Wales (cutivated seeds PI 619001 USDA-Pullman)	2x	AF303401	AF478504	EF379024	------	------	------
Megalachne berteroniana Steud.	Chile: Juan Fernandez archipelago; Masatierra; Cordón; Salsipuedes. Leg. T. Stuessy; D. Crawford; P. López; J. Soto. 11751 (0S)	?	------	------	------	SAMN14647074	SRR11576608	MT145307	184	5288	34688	46952
Megalachne masafuerana (Skottsb. & Pilg. ex. Pilg.) Matthei	Chile: Juan Fernandez archipelago; Masafuera; Cuchillo del Iman. Leg. A; Landero; L. Gaete. 9150 (0S)	?	------	------	------	SAMN14647075	SRR11576607	MT145308	184	6134	81518	48050
Podophorus bromoides Phil.	Chile: Juan Fernandez archipielago; Masatierra	?	MT022522	Github	Github	SAMN14668162	SRR11586977	------	197	6694	228488	-----
Micropyropsis tuberosa Romero-Zarco & Cabezudo	Spain: Huelva; Almonte; Catalan P. & al.; UZ-89.07	2x	JQ972944	AF533037.1	EF379013	------	------	------
Pseudobromus breviligulatus Stapf ex A. Camus	Madagascar: Andringitra National Park; Vorontsova F1221	?	KY368806	KY368858	KY368909	------	------	------
Psilurus incurvus (Gouan) Schinz & Thell.	Spain: Malpartida de Plasencia. UZ 31.07	4x	JQ972945	AF478533	JQ973013	------	------	------
Vulpia alopecuros (Schousb.) Dumort.	Portugal: Algave; Meia Praia Lagos; Stace C.A.; LEI	2x	AF478491	AF487617	EF585117	------	------	------
Vulpia bromoides (L.) Gray	Spain: Lugo; Lancara; Lopez Rodrıguez J.A. 01080; UZ	2x	AF478485	AF487616	EF585119	------	------	------
Vulpia ciliata Dumort.	Spain: Toledo; Mar de Ontígola; UZ 109.07	4x	------	------	------	SAMN14647076	SRR11576606	MT145309	220	11801	83344	104788
Vulpia fasciculata (Forsk.) Samp.	Spain: Barcelona; Vilanova; Pyke S. 15.2000; UZ	4x	AF478487	AF478528	EF585121	------	------	------
Vulpia geniculata (L.) Link	Spain: Sevilla; Constantina; JACA J29397	2x	AF478490	AF478531	EF585123	------	------	------
Vulpia membranacea (L.) Dumort.	Spain: Cadiz; Sanlucar de Barrameda; La Algaida; Catalan P.; UZ-8.2002;	2x	AY118090	AY118101	EF585124	------	------	------
Vulpia microstachys (Nutt.) Munro	USA: California; W of San Luis Obispo; Soreng R.J. 7406	?	EF584981	EF593015	EF585125	------	------	------
Vulpia muralis (Kunth) Nees	Spain: Zaragoza; Actur; Pyke & Catalan UZ-11.2000	2x	AY118091	AY118102	EF585126	------	------	------
Vulpia myuros (L.) C.C. Gmel.	USA: Washington; King Co Seattle Lake Forest Park; Catalan P. UZ-54.2001	6x	AY118092	AY118103	EF585127	------	------	------
Vulpia octoflora (Walter) Rydb.	USA: Washington; Okanogan; Peterson P.M. 3263	2x	EF584982.1	EF593016	EF585128	------	------	------
Vulpia sicula (C. Presl) Link	Italia: Sicilia; Piano Battaglia - Battagliete; Madone	2x	------	------	------	SAMN14647077	SRR11576605	MT145310	223	11327	82474	148794
Vulpia unilateralis (L.) Stace	Spain: Zaragoza; Vedado de Peñaflor; Catalan P.; UZ-18.2002	2x	AY118095	AY118106	EF585130	------	------	------
Wangenheimia lima (L.) Trin.	Spain: Zaragoza; Vedado de Peñaflor; Catalan P. & al.; UZ-17.2000	2x	AF478498	AF478536	EF585131	------	------	------
Outgroups
Avena fatua L.	Russia	6x	DQ539563	DQ631428	DQ631494	------	------	------
Brachypodium distachyon (L.) P.Beauv.	Spain: Caceres; UZ 28.07	2x	AF303399	AF478500	DQ336855	NC_011032.1	NC_011032.1	Phytozome Bd21 v.3.1
Catapodium rigidum (L.) C.E. Hubb.	Spain: Segovia; Sepúlveda; López Rodríguez J.A. s.n.; UZ	2x	AF532940	AF533034	EF584986	------	------	------
Cynosurus echinatus L.	Spain: Soria; Monte Valonsadero; López Rodríguez J.A. s.n.; UZ	2x	AF532937	AF533031	EF584993	------	------	------
Dactylis glomerata subsp. hispanica (Roth) Nyman	Spain: Zaragoza; Peñaflor; Catalán P. & al. s.n.; UZ	2x	AF393014	AF533027	EF584994	------	------	------
Desmazeria sicula (Jacq.) Dumort.	Seed Bank; Royal Botanic Gardens Kew;17332; Soreng R.J. s.n. (BH)	2x	EF584917	EF592948	EF584989	------	------	------
Hainardia cylindrica (Willd.) Greuter	Spain: Zaragoza; Parque Tio Jorge; Pyke S. s.n.; UZ	4x	AF532941	AF533035	EF584990	------	------	------
Lamarckia aurea (L.) Moench	Spain: Zaragoza; Puenete de la Almozara; PC 14.2000; UZ	2x	AF532935	AF533029	EF584995	------	------	------
Oryza sativa L.	China: National Hybrid Rice Research and Development Center (NHRRDC); China	2x	AF478499	AF478537	EF584997	AY522331.1	AY522331.1	AP008215
Parapholis incurva (L.) C.E. Hubb.	Spain: Zaragoza; Vedado de Pen ̃aflor; Catalán P. & al. 23;2000; UZ	4x	AF532942	AF533036	EF584991	------	------	------
Poa alpina L.	Andorra: Ordino; Llamas; Acedo & Alonso; 62; LEB	2x, 4x, 6x	AY099005	AY099003	EF584999	------	------	------
Puccinellia distans (L.) Parl.	Spain: Navarra; Lazagurría; JACA207897	2x, 4x, 6x	AF532934	AF533024	EF584985	------	------	------
Puccinellia frigida (Phil.) I.M. Johnst.	Genbank	?	KF020797	JF904754	JF904753	------	------	------
Secale cereale L.	USDA	2x	AY524829	AY528949	EF584998	------	------	------
Sphenopus divaricatus (Gouan) Rchb.	Spain; Zaragoza; Vedado de Penñaflor; Catalán P. & al. s.n.;UZ	2x, 4x	AF532939	AF533033	EF584992	------	------	------
Triticum aestivum L.	K. Tanno RIB-15296S	6x	KY368800	KY368852	KY368903	------	------	------
Newly generated Loliinae data are indicated in bold
Loliinae plastome data and sequences have been deposited in Genbank under BioProject (SRA accession) PRJNA626668 (https://www.ncbi.nlm.nih.gov/sra/PRJNA626668) and at Github [https://github.com/Bioflora/Loliinae_plastomes (unfiltered, filtered) and https://github.com/Bioflora/Podophorus_plastome (unfiltered, filtered, trnLF, trnTL)].

## Sheet: Supplementary Table 2A
Taxon	Operational areas
	A	B	C	D	E	F	G	H	I	J	K	L	M
Dielsiochloa floribunda (Pilg.) Pilg.	0	0	0	0	0	0	0	0	1	0	0	0	0
Festuca abyssinica Hochst. ex A. Rich.	0	0	1	0	0	0	0	0	0	0	0	0	0
Festuca actae Connor	0	0	0	0	0	0	1	0	0	0	0	0	0
Festuca africana (Hack.) Clayton	0	1	0	1	0	0	0	0	0	0	0	0	0
Festuca agustinii Linding.	0	0	0	0	0	0	0	0	0	0	1	0	0
Festuca aloha Catalán, Soreng & P.M.Peterson	0	0	0	0	0	0	0	0	0	0	0	1	0
Festuca alpina Suter	0	0	0	0	0	1	0	0	0	0	0	0	0
Festuca altaica Trin.	0	0	0	0	0	1	0	1	0	0	0	0	0
Festuca amplissima Rupr.	0	0	0	0	0	0	0	1	0	0	0	0	0
Festuca andicola Kunth	0	0	0	0	0	0	0	0	1	0	0	0	0
Festuca argentina (Speg.) Parodi	0	0	0	0	0	0	0	0	0	1	0	0	0
Festuca asperella E.B. Alexeev	0	0	0	0	0	0	0	1	0	0	0	0	0
Festuca asplundii E.B. Alexeev	0	0	0	0	0	0	0	0	1	0	0	0	0
Festuca baffinensis Polunin	0	0	0	0	0	1	0	1	0	0	0	0	0
Festuca bajacaliforniana Gonz.-Led. & S.D. Koch	0	0	0	0	0	0	0	1	0	0	0	0	0
Festuca borbonica Spreng.	0	1	0	0	0	0	0	0	0	0	0	0	0
Festuca brachyphylla Schult. & Schult. f.	0	0	0	0	0	1	0	1	0	0	0	0	0
Festuca breviglumis Swallen	0	0	0	0	0	0	0	1	0	0	0	0	0
Festuca brevissima Jurtzev	0	0	0	0	0	1	0	1	0	0	0	0	0
Festuca calabrica Huter, Porta & Rigo	0	0	0	1	0	0	0	0	0	0	0	0	0
Festuca caldasii (Kunth) Kunth	0	0	0	0	0	0	0	0	1	0	0	0	0
Festuca californica Vasey	0	0	0	0	0	0	0	1	0	0	0	0	0
Festuca calligera (Piper) Rydb.	0	0	0	0	0	0	0	1	0	0	0	0	0
Festuca capillifolia Dufour ex Roem. & Schult.	0	0	0	1	0	0	0	0	0	0	0	0	0
Festuca caprina Nees	1	0	1	0	0	0	0	0	0	0	0	0	0
Festuca carpatica F. Dietr.	0	0	0	0	0	1	0	0	0	0	0	0	0
Festuca casapaltensis Ball	0	0	0	0	0	0	0	0	1	0	0	0	0
Festuca chimborazensis E.B. Alexeev	0	0	0	0	0	0	0	0	1	0	0	0	0
Festuca chodatiana (St.-Yves) E.B.Alexeev	0	0	1	0	0	0	0	0	0	0	0	0	0
Festuca claytonii E.B.Alexeev	0	0	1	0	0	0	0	0	0	0	0	0	0
Festuca cochabambana E.B. Alexeev	0	0	0	0	0	0	0	0	0	1	0	0	0
Festuca coerulescens Desf.	0	0	0	1	0	0	0	0	0	0	0	0	0
Festuca compressifolia J. Presl	0	0	0	0	0	0	0	0	1	0	0	0	0
Festuca contracta Kirk	0	0	0	0	0	0	1	0	0	1	0	0	0
Festuca costata Nees	1	0	1	0	0	0	0	0	0	0	0	0	0
Festuca cuzcoensis Stančík & P.M. Peterson	0	0	0	0	0	0	0	0	1	0	0	0	0
Festuca dichoclada Pilg.	0	0	0	0	0	0	0	0	0	1	0	0	0
Festuca dimorpha Guss.	0	0	0	1	0	0	0	0	0	0	0	0	0
Festuca donax Lowe	0	0	0	0	0	0	0	0	0	0	1	0	0
Festuca durandoi Clauson	0	0	0	1	0	0	0	0	0	0	0	0	0
Festuca elata Keng ex E.B. Alexeev	0	0	0	0	0	1	0	0	0	0	0	0	0
Festuca elegans Boiss.	0	0	0	1	0	0	0	0	0	0	0	0	0
Festuca elviae Briceño	0	0	0	0	0	0	0	0	1	0	0	0	0
Festuca eskia Ramond ex DC.	0	0	0	1	0	0	0	0	0	0	0	0	0
Festuca extremiorientalis Ohwi	0	0	0	0	0	1	0	0	0	0	0	0	0
Festuca fenas Lag.	0	0	0	0	1	0	0	0	0	0	0	0	0
Festuca fimbriata Nees	0	0	0	0	0	0	0	0	0	1	0	0	0
Festuca flacca Hack. ex E.B. Alexeev	0	0	0	0	0	0	0	0	1	0	0	0	0
Festuca fontqueriana (St.-Yves) Romo	0	0	0	1	0	0	0	0	0	0	0	0	0
Festuca francoi Fern. Prieto, C. Aguiar, E. Días & M.I. Gut.	0	0	0	0	0	0	0	0	0	0	0	1	0
Festuca gautieri (Hack.) K. Richt.	0	0	0	1	0	0	0	0	0	0	0	0	0
Festuca gigantea (L.) Vill.	0	0	0	0	1	1	0	0	0	0	0	0	0
Festuca gilbertiana E.B. Alexeev ex S.M. Phillips	0	0	1	0	0	0	0	0	0	0	0	0	0
Festuca glacialis Miégev. ex Bureau	0	0	0	1	0	0	0	0	0	0	0	0	0
Festuca glumosa Hack. ex E.B. Alexeev	0	0	0	0	0	0	0	0	1	0	0	0	0
Festuca gracillima Hook. f.	0	0	0	0	0	0	0	0	0	1	0	0	0
Festuca griffithiana (St.-Yves) Krivot.	0	0	0	0	0	1	0	0	0	0	0	0	0
Festuca hephaestophila Nees (Nees)	0	0	0	0	0	0	0	1	0	0	0	0	0
Festuca hieronymi Hack.	0	0	0	0	0	0	0	0	0	0	1	0	0
Festuca holubii Stančík	0	0	0	0	0	0	0	0	1	0	0	0	0
Festuca hyperborea Holmen ex Fred.	0	0	0	0	0	1	0	1	0	0	0	0	0
Festuca hystrix Boiss.	0	0	0	1	0	0	0	0	0	0	0	0	0
Festuca iberica (Hack.) K. Richt.	0	0	0	1	0	0	0	0	0	0	0	0	0
Festuca indigesta Boiss.	0	0	0	1	0	0	0	0	0	0	0	0	0
Festuca juncifolia Chaub.	0	0	0	0	0	1	0	0	0	0	0	0	0
Festuca kingii (S. Watson) Cassidy	0	0	0	0	0	0	0	1	0	0	0	0	0
Festuca lasto Boiss.	0	0	0	1	0	0	0	0	0	0	0	0	0
Festuca laxa Host	0	0	0	0	0	1	0	0	0	0	0	0	0
Festuca longipes Stapf	1	0	0	0	0	0	0	0	0	0	0	0	0
Festuca luciarum Connor	0	0	0	0	0	0	1	0	0	0	0	0	0
Festuca magellanica Lam.	0	0	0	0	0	0	0	0	0	1	0	0	0
Festuca mairei St.-Yves	0	0	0	1	0	0	0	0	0	0	0	0	0
Festuca mekiste Clayton	0	0	1	0	0	0	0	0	0	0	0	0	0
Festuca modesta Nees ex Steud.	0	0	0	0	0	1	0	0	0	0	0	0	0
Festuca molokaiensis Soreng, P.M. Peterson & Catalán	0	0	0	0	0	0	0	0	0	0	0	1	0
Festuca nardifolia Griseb.	0	0	0	0	0	0	0	0	0	1	0	0	0
Festuca nemoralis Türpe	0	0	0	0	0	0	0	0	0	1	0	0	0
Festuca nitida Kit. ex Schult.	0	0	0	0	0	1	0	0	0	0	0	0	0
Festuca novae-zelandiae (Hack.) Cockayne	0	0	0	0	0	0	1	0	0	0	0	0	0
Festuca orthophylla Pilg.	0	0	0	0	0	0	0	0	0	0	1	0	0
Festuca ovina L.	0	0	0	0	0	1	0	0	0	0	0	0	0
Festuca pampeana Speg.	0	0	0	0	0	0	0	0	0	1	0	0	0
Festuca paniculata (L.) Schinz & Thell	0	0	0	1	0	1	0	0	0	0	0	0	0
Festuca parvigluma Steud.	0	0	0	0	0	1	0	0	0	0	0	0	0
Festuca peruviana Infantes	0	0	0	0	0	0	0	0	1	0	0	0	0
Festuca petraea Guthn. ex Seub	0	0	0	0	0	0	0	0	0	0	1	0	0
Festuca picturata Pils	0	0	0	0	0	1	0	0	0	0	0	0	0
Festuca pratensis Huds.	0	0	0	0	0	1	0	0	0	0	0	0	0
Festuca pringlei St.-Yves	0	0	0	0	0	0	0	1	0	0	0	0	0
Festuca procera Kunth	0	0	0	0	0	0	0	0	1	0	0	0	0
Festuca pseudeskia Boiss.	0	0	0	1	0	0	0	0	0	0	0	0	0
Festuca pumila Chaix	0	0	1	0	0	1	0	0	0	0	0	0	0
Festuca purpurascens Banks & Sol. ex Hook. f.	0	0	0	0	0	0	0	0	0	1	0	0	0
Festuca pyrenaica Reut.	0	0	0	1	0	0	0	0	0	0	0	0	0
Festuca pyrogea Speg.	0	0	0	0	0	0	0	0	0	0	1	0	0
Festuca quadridentata Kunth	0	0	0	0	0	0	0	0	1	0	0	0	0
Festuca rigescens (J. Presl) Kunth	0	0	0	0	0	0	0	0	1	0	0	0	0
Festuca rubra L.	0	0	0	0	0	1	0	0	0	0	0	0	0
Festuca saximontana Rydb.	0	0	0	0	0	0	0	1	0	0	0	0	0
Festuca scabra Vahl	1	0	0	0	0	0	0	0	0	0	0	0	0
Festuca scariosa Lag. ex Willk.	0	0	0	1	0	0	0	0	0	0	0	0	0
Festuca spectabilis Jan	0	0	0	1	0	1	0	0	0	0	0	0	0
Festuca subantarctica Parodi	0	0	0	0	0	0	0	0	0	1	0	0	0
Festuca subulata Trin.	0	0	0	0	0	0	0	1	0	0	0	0	0
Festuca subverticillata (Pers.) E.B. Alexeev	0	0	0	0	0	0	0	1	0	0	0	0	0
Festuca superba Parodi ex Türpe	0	0	0	0	0	0	0	0	0	1	0	0	0
Festuca thurberi Vasey	0	0	0	0	0	0	0	1	0	0	0	0	0
Festuca tolucensis Kunth	0	0	0	0	0	0	0	1	1	0	0	0	0
Festuca triflora J.F. Gmel.	0	0	0	1	0	0	0	0	0	0	0	0	0
Festuca vaginalis (Benth.) Laegaard	0	0	0	0	0	0	0	0	1	0	0	0	0
Festuca valdesii Gonz.-Led. & S.D. Koch	0	0	0	0	0	0	0	1	0	0	0	0	0
Festuca ventanicola Speg.	0	0	0	0	0	0	0	0	0	1	0	0	0
Festuca vulpioides Steud.	1	0	0	0	0	0	0	0	0	0	0	0	0
Festuca yalaensis Joch. Müll. & Catalán	0	0	0	0	0	0	0	0	0	1	0	0	0
Hellerochloa fragilis (Luces) Rauschert	0	0	0	0	0	0	0	0	1	0	0	0	0
Lolium perenne L.	0	0	0	0	1	1	0	0	0	0	0	0	0
Megalachne berteroniana Steud.	0	0	0	0	0	0	0	0	0	0	0	0	1
Megalachne masafuerana (Skottsb. & Pilg. ex. Pilg.) Matthei	0	0	0	0	0	0	0	0	0	0	0	0	1
Podophorus bromoides Phil.	0	0	0	1	0	0	0	0	0	0	0	0	0
Micropyropsis tuberosa Romero-Zarco & Cabezudo	0	0	0	0	0	0	0	0	0	0	0	0	1
Pseudobromus breviligulatus Stapf ex A. Camus	0	1	1	0	0	0	0	0	0	0	0	0	0
Psilurus incurvus (Gouan) Schinz & Thell.	0	0	0	1	0	1	0	0	0	0	0	0	0
Vulpia alopecuros (Schousb.) Dumort.	0	0	0	1	0	0	0	0	0	0	0	0	0
Vulpia bromoides (L.) Gray	0	0	0	1	0	1	0	0	0	0	0	0	0
Vulpia ciliata Dumort.	0	0	0	1	0	0	0	0	0	0	0	0	0
Vulpia fasciculata (Forsk.) Samp.	0	0	0	1	0	1	0	0	0	0	0	0	0
Vulpia geniculata (L.) Link	0	0	0	1	0	0	0	0	0	0	0	0	0
Vulpia membranacea (L.) Dumort.	0	0	0	1	0	0	0	0	0	0	0	0	0
Vulpia microstachys (Nutt.) Munro	0	0	0	0	0	0	0	1	0	0	0	0	0
Vulpia muralis (Kunth) Nees	0	0	0	1	0	0	0	0	0	0	0	0	0
Vulpia myuros (L.) C.C. Gmel.	0	0	0	1	0	1	0	0	0	0	0	0	0
Vulpia octoflora (Walter) Rydb.	0	0	0	0	0	0	0	1	0	0	0	0	0
Vulpia sicula (C. Presl) Link	0	0	0	1	0	0	0	0	0	0	0	0	0
Vulpia unilateralis (L.) Stace	0	0	0	1	0	0	0	0	0	0	0	0	0
Wangenheimia lima (L.) Trin.	0	0	0	1	0	0	0	0	0	0	0	0	0

## Sheet: Supplementary Table 2B
	Time slice I (23 to 16 Ma)
	A	B	C	D	E	F	G	H	I	J	K	L	M
A	--	0.5	0.75	0.01	0.25	0.25	0.01	0.01	0.01	0.01	0.01	0.01	0.01
B		--	0.75	0.01	0.01	0.25	0.01	0.01	0.01	0.01	0.01	0.01	0.01
C			--	0.01	0.25	0.75	0.25	0.01	0.01	0.01	0.01	0.01	0.01
D				--	0.5	0.01	0.01	0.01	0.01	0.01	0.01	0.01	0.01
E					--	0.75	1.0	0.01	0.01	0.01	0.01	0.01	0.01
F						--	1.0	0.5	0.01	0.01	0.01	0.01	0.01
G							--	0.5	0.25	0.75	0.01	0.01	0.01
H								--	0.01	0.01	0.01	0.01	0.01
I									--	0.25	0.01	0.01	0.01
J										--	0.5	0.25	0.01
K											--	0.75	0.01
L												--	0.01
M													--
	Time slice II (16 to 7.2 Ma)
	A	B	C	D	E	F	G	H	I	J	K	L	M
A	--	0.5	0.75	0.25	0.25	0.25	0.01	0.01	0.01	0.01	0.01	0.01	0.01
B		--	0.5	0.01	0.01	0.25	0.01	0.01	0.01	0.01	0.01	0.01	0.01
C			--	0.25	0.5	0.75	0.01	0.01	0.01	0.01	0.01	0.01	0.01
D				--	0.75	0.25	0.01	0.01	0.01	0.01	0.01	0.01	0.01
E					--	0.75	1.0	0.01	0.01	0.01	0.01	0.01	0.01
F						--	1.0	0.25	0.01	0.5	0.01	0.01	0.01
G							--	0.25	0.25	0.75	0.01	0.01	0.01
H								--	0.01	0.01	0.01	0.01	0.01
I									--	0.25	0.01	0.01	0.01
J										--	0.75	0.25	0.01
K											--	1.0	0.01
L												--	0.01
M													--
	Time slice III (7.2 to 2.6 Ma)
	A	B	C	D	E	F	G	H	I	J	K	L	M
A	--	0.5	0.75	0.01	0.25	0.25	0.01	0.01	0.01	0.01	0.01	0.01	0.01
B		--	0.5	0.01	0.01	0.01	0.01	0.01	0.01	0.01	0.01	0.01	0.01
C			--	0.01	0.5	0.75	0.01	0.01	0.01	0.01	0.01	0.01	0.01
D				--	0.75	0.25	0.01	0.01	0.01	0.01	0.01	0.01	0.01
E					--	1.0	1.0	0.01	0.01	0.01	0.01	0.01	0.01
F						--	1.0	0.25	0.01	0.01	0.01	0.01	0.01
G							--	0.5	0.25	0.5	0.01	0.01	0.01
H								--	0.01	0.01	0.01	0.01	0.01
I									--	0.25	0.25	0.01	0.01
J										--	1.0	0.5	1.0
K											--	1.0	0.01
L												--	0.01
M													--
	Time slice IV (2.6 Ma to present)
	A	B	C	D	E	F	G	H	I	J	K	L	M
A	--	0.5	0.75	0.01	0.25	0.25	0.01	0.01	0.01	0.01	0.01	0.01	0.01
B		--	0.5	0.01	0.01	0.25	0.01	0.01	0.01	0.01	0.01	0.01	0.01
C			--	0.01	0.25	0.75	0.01	0.01	0.01	0.01	0.01	0.01	0.01
D				--	0.75	0.25	0.01	0.01	0.01	0.01	0.01	0.01	0.01
E					--	0.75	1.0	0.01	0.01	0.01	0.01	0.01	0.01
F						--	1.0	0.5	0.01	0.5	0.01	0.01	0.01
G							--	0.75	0.25	1.0	0.01	0.01	0.01
H								--	0.01	0.01	0.01	0.01	0.01
I									--	0.25	0.25	0.01	0.01
J										--	1.0	0.75	1.0
K											--	1.0	0.01
L												--	0.01
M													--

## Sheet: Supplementary Table 2C
Taxon	Operational areas
	H	N	O	P	Q
Festuca nemoralis Türpe	0	0	1	0	0
Festuca pampeana Speg.	0	1	0	0	0
Festuca ventanicola Speg.	0	1	0	0	0
Megalachne berteroniana Steud.	0	0	0	1	0
Megalachne masafuerana (Skottsb. & Pilg. ex. Pilg.) Matthei	0	0	0	0	1
Podophorus bromoides Phil.	0	0	0	1	0
Vulpia microstachys (Nutt.) Munro	1	0	0	0	0
Vulpia octoflora (Walter) Rydb.	1	0	0	0	0

## Sheet: Supplementary Table 2D
Time slice III (9 to 2.5 Ma)
	H	N	O	P	Q
H	--	0.01	0.5	0.25	0.01
N		--	1.0	0.75	0.01
O			--	1.0	0.01
P				--	0.01
Q					--
Time slice IV (2.5 Ma to present)
	H	N	O	P	Q
H	--	0.01	0.5	0.25	0.25
N		--	0.01	0.75	0.5
O			--	1.0	0.75
P				--	1.0
Q					--
